# Supplementary material
Source: PubMed Central journal article supplement (PMC7452667)
Supplement: mmc1.pdf [file mmc1.pdf]

## **Supplementary material**

- 1. Detailed methods**
  - a. Immunohistochemistry
  - b. Table 1s. List of antibodies used and their specificities
  - c. RNA in situ hybridization and immunohistochemical analysis
  - d. SARS-CoV2 RNA PCR evaluation
  - e. Double immunofluorescence for the identification of NETs
  - f. Negative staining electron microscopy
  - g. Transmission Electron Microscopy
- 2. Table 2s. Main clinical data of COVID-19 positive patients and their newborns**
- 3. Table 3s. Main clinical data of COVID-19 negative patients and their newborns**
- 4. Table 4s. Main morphological changes observed in the 86 non COVID-19 placentas**
- 5. Supplementary figures**
- 6. References**

## Detailed methods

### Immunohistochemistry

Formalin-fixed paraffin embedded (FFPE) tissue sections were used for immunohistochemical staining. For SARS-CoV2 proteins a manual procedure was used: upon microwave oven epitope retrieval in TRIS-EDTA buffer (pH 9.00) with 2+3 cycles (5 minutes each) at 1000W and 750W respectively, sections were incubated at room temperature with primary antibodies for two hours, followed by incubation with EnVision+System-HRP Labelled Polymer Anti-Rabbit (Dako) for 30 minutes. Chromogenic reaction was done using Diaminobenzidine. The slides were finally counterstained with Meyer's Haematoxylin.

For double immunohistochemistry, after completing the first immune reaction (see above), the second reaction was visualized using Mach 4 MR-AP (Biocare Medical, Concord, CA, USA), followed by Ferangi Blue (Biocare Medical) as chromogen<sup>1</sup>.

**Table 1s. List of antibodies used and their specificities.**

| Antibodies<br>(Clone; Source *)                       | Antigen retrieval<br>(cycles)** | Antibody<br>dilution | Double stain<br>combinations | Source                                |
|-------------------------------------------------------|---------------------------------|----------------------|------------------------------|---------------------------------------|
| SARS-CoV-2 (2019-nCoV)<br>Spike Antibody<br>(007; mR) | MwTE(5c)                        | 1:100                | (A)(B)(C)(D)                 | Sino Biological (Beijing, CHN)        |
| SARS-CoV-2 (2019-nCoV)<br>Nucleocapsid Antibody (pR)  | MwTE(5c)                        | 1:2500               |                              | Sino Biological                       |
| ARGINASE-1<br>(SP156; mM)                             | MwE(5c)                         | 1:100                |                              | Cell Marque (St.Louis, MI, U.S.)      |
| C4d<br>(SP91; mM)                                     | MwE(5c)                         | Ready to use         |                              | Cell Marque                           |
| CD3<br>(LN10; mM)                                     | MwE(3c)                         | 1:100                |                              | Leica Biosystem (Wetzlar, D)          |
| CD4<br>(4B12; mM)                                     | MwE(5c)                         | 1:50                 |                              | Thermo Scientific (Waltham, MA, U.S.) |
| CD8<br>(C8/144B; mM)                                  | MwE(3c)                         | 1:50                 |                              | Agilent (Santa Clara, CA, U.S.)       |
| CD10<br>(56C6; mM)                                    | MwE(5c)                         | 1:50                 | (E)                          | Leica Biosystem                       |
| CD14<br>(7; mM)                                       | MwE(5c)                         | 1:50                 | (A)(F)(G)                    | Leica Biosystem                       |
| CD15<br>(MMA; mM)                                     | MwE(5c)                         | 1:250                |                              | Thermo Scientific                     |
| CD16<br>(SP175; mM)                                   | MwE(5c)                         | Ready to use         |                              | Cell Marque                           |
| CD20<br>(L26; mM)                                     | MwE(3c)                         | 1:250                |                              | Leica Biosystem (Nussloch, D)         |
| CD34<br>(QBEND/10; mM)                                | MwE(3c)                         | 1:200                | (C)(H)(I)(J)                 | Leica Biosystem                       |
| CD38<br>(SPC32; mM)                                   | MwE(3c)                         | 1:200                |                              | Leica Biosystem                       |
| CD56<br>(123C3.D5; mM)                                | MwE(5c)                         | 1:50                 |                              | Emergo Europe (Prinsessegracht, NL)   |
| CD61<br>(Y2/51; mM)                                   | MwE(5c)                         | 1:100                |                              | DB (Pleasanton, CA, U.S)              |
| CD66b<br>(G10F5; mM)                                  | MwC(5c)                         | 1:150                | (D)(E)(F)                    | BioLegend (San Diego, CA, U.S.)       |
| CD68<br>(PG-M1; mM)                                   | MwE(3c)                         | 1:200                |                              | Agilent                               |
| CD123<br>(9F5; mM)                                    | MwE(3c)                         | 1:50                 |                              | BD (Franklin Lakes, NJ, U.S.)         |
| CD163<br>(10D6; mM)                                   | MwE(3c)                         | 1:50                 |                              | DB                                    |

| Antibodies<br>(Clone; Source *) | Antigen retrieval<br>(cycles)** | Antibody<br>dilution | Double stain<br>combinations | Source                                 |
|---------------------------------|---------------------------------|----------------------|------------------------------|----------------------------------------|
| CD303/BDCA2<br>(124B3-13; mM)   | MwE(5c)                         | 1:100                |                              | Dendritics (Lyon, F)                   |
| Pan Cytokeratin<br>(MNF116; mM) | MwE(3c)                         | 1:200                | (H)                          | Agilent                                |
| CSF-1R<br>(FER216; mM)          | MwE(5c)                         | 1:1000               |                              | Merck-Millipore (Burlington, MA, U.S.) |
| CXCR4<br>(UMB-2; mR)            | MwTE(5c)                        | 1:500                | (I)                          | Abcam (Cambridge, GB)                  |
| FIBRINOGEN<br>(pR)              | None                            | 1:3000               |                              | Agilent                                |
| GRANZIME-B<br>(11F1; mM)        | MwE(3c)                         | 1:20                 |                              | Leica Biosystem                        |
| LAT<br>(LAT-1; mM)              | MwE(5c)                         | 1:50                 | (J)                          | Agilent                                |
| Myeloperoxidase<br>(pR)         | None                            | 1:7000               | (C)(G)                       | Agilent                                |
| PD-L1<br>(22C3; mM)             | ***                             | 1:40                 |                              | DAKO                                   |
| PERFORIN<br>(5B10; mM)          | MwE(3c)                         | 1:50                 |                              | Leica Biosystem                        |
| TCR AB (8A3; mM)                | P                               | 1:50                 |                              | Thermo Scientific                      |
| TCR $\delta$ (H-41; mM)         | MwE(5c)                         | 1:50                 |                              | Santa Cruz (Dallas, TX, U.S.)          |
| TIA-1 (TIA-1; mM)               | MwE(3c)                         | 1:100                |                              | Abcam                                  |

\* mM: monoclonal Mouse; mR: monoclonal rabbit, pR: polyclonal rabbit

\*\* MwTE(5c): microwave TRIS-EDTA BUFFER pH9.00, 2 cycles at 1000W and 3 cycles at 750W(5 minutes each); MwE(3c): microwave EDTA BUFFER pH 8.00, 3 cycles at 750W(5 minutes each); MwE(5c): microwave EDTA BUFFER pH 8.00, 2 cycles at 1000W and 3 cycles at 750W(5 minutes each); MwC (5c): microwave CITRATE BUFFER pH 6,00, 2 cycles at 1000W and 3 cycles at 750W(5 minutes each); P: Protease 20 minutes at 37°C;

\*\*\* PD-L1 staining has been developed on BenchMark Ultra system (Roche), according to the manufacture procedure

### RNA in situ hybridization and immunohistochemical analysis

In situ hybridization with V-nCov2019-S-antisense probes specific for the S gene encoding the spike protein (cat.# 845701; accession NC\_045512.2; Advanced Cell Diagnostic) was performed using RNAscope 2.5 HD Detection Reagent-BROWN (Advanced Cell Diagnostic) in accordance with the manufacturer's protocol adopting an extended 1 hour incubation in Amp 5 and 30 minutes incubation in Amp 6.

Homo sapiens ubiquitin C (cat.#310041; accession #NM\_021009; Advanced Cell Diagnostic) was used as positive control probe.

After evaluation of the ISH result, on the same slide immunostain for CD14 was performed, using antigen unmasking using Target Retrieval Solution pH9 (Novocastra, Leica Biosystems) at 98°C for 15 minutes. The section was brought to room temperature and washed with PBS. After Fc blocking by a specific protein block (BioCare), anti-CD14 (clone EPR3653 Cell Marque, 1:50) primary antibody was applied for 1 hour and staining was revealed using Rabbit on Rodent AP-Polymer (BioCare). Vulcan Fast Red was used as substrate-chromogen, followed by counterstaining with Harris's hematoxylin.

Slides digitalization was performed before and after CD14 stain using an Aperio CS2 digital scanner (Leica Biosystems) with the ImageScope software. Comparison of the single RNA-scope stain and the double stain was performed using the synchronize function.

### SARS-CoV2 RNA PCR detection

Viral RNA was extracted from formalin fixed placenta samples. Briefly, the tissue was repeatedly washed for 30 -60 minutes in 1X PBS at room temperature. After the final wash, the tissue was homogenized in 1ml of 1X PBS (10% w/v). Ten microliters of the tissue homogenate were incubated with 1ml of Trizol reagent (Qiagen, Hilden, Germany), and processed according to the manufacturer's instructions. The RNA pellet was resuspended in 50 $\mu$ l of H<sub>2</sub>O RNase free and used for the Real Time RT-PCR reaction. The SARS-CoV-2 RNA detection was performed using primers and probe targeting gene E, as designed by Corman et al. PCR reactions were performed on 5  $\mu$ L of extracted viral RNA in a final volume of 25  $\mu$ L, which also contained 12,5  $\mu$ l of One Step prime Script III RT-qPCR Mix (Takara, Shiga, Japan) 0.5  $\mu$ L of each forward and reverse primer (final concentration 400 nM), 0.5  $\mu$ L of probe (final concentration

100 nM). The SARS-CoV-2 RNA was reverse transcribed at 52°C for 15 minutes, followed by 1 cycle of Taq polymerase activation at 95°C for 10 seconds. Amplification consisted of 45 cycles at 95°C for 5 s and 60°C for 30 s. Amplification were performed on a CFX96 Touch Real-Time PCR Detection System (Bio-Rad Laboratories) and data were analyzed with the Software Bio-Rad CFX Manager 3.1.<sup>2</sup>

#### **Double immunofluorescence for the identification of NETs**

For double-marker immunofluorescence, after antigen retrieval, the sections were incubated for 1 hour at room temperature with a combination of the two primary antibodies: histone H3 (Abcam, 1:150) and Myeloperoxidase (Cell Marque, 1:200). The binding of the primary antibodies to their respective antigenic substrates was revealed by made-specific secondary antibodies conjugated with Alexa-488 (Life Technologies, 1:250) and Alexa-568 (Life Technologies, 1:300) fluorochromes. Nuclei were subsequently visualized with DAPI.

#### **Negative staining electron microscopy (nsEM)<sup>3</sup>**

Formalin-fixed tissue fragments (about 0.5 gr each) from respectively the maternal side, the central part and the fetal side of the placenta were rinsed with PBS, then minced with scissors and manually grinded using pestle and mortar with the addition of quartz powder by adding distilled water (10% w/v). The three homogenates were then centrifuged at 10000 rpm for 30 min to eliminate quartz and gross debris and the supernatants finally subjected to negative staining electron microscopy using the Airfuge method (1). Samples were ultracentrifuged (Airfuge, Beckman Coulter Inc. Life Sciences, Indianapolis, Indiana, USA) for 15 min at 82,000xg using a rotor holding six 175- $\mu$ l test tubes in which specific adapters for 3mm carbon-coated Formvar copper grids were placed. The grids were then stained using 2% sodium phosphotungstate (pH 6.8) for 1.5min and observed under a Tecnai G2 Spirit Biotwin transmission electron microscope (FEI, Hillsboro, Oregon, USA) at 20,500–43,000x. Attempts to identify the observed viral particles were based on their morphological characteristics.

#### **Transmission Electron Microscopy**

For electron microscopy, small tissue fragments formalin fixed were placed in 2.5% glutaraldehyde in cacodylate buffer 0.1 M for 3 hr at 4°C and then post-fixed in 2% osmium tetroxide in the same buffer for 1 hr at 4°C. Dehydration in progressive ethanol concentrations, propylene oxide, and embedding in Epon 812 mixture were performed, as previously described<sup>4</sup>. Semithin (1 $\mu$ m-thick) sections cut with an ultramicrotome (Ultracut E- Leica, Microsystems S.r.l., Milan, Italy) using a diamond glass were collected, stained by toluidine blue and examined by light microscopy. For ultrastructural analysis, thin (80 nm-thick) sections obtained from selected zones were collected on 200 meshes-formvar coated copper grids, double stained with uranyl acetate and lead citrate and examined using FEI Tecnai G2 Spirit or CM12 TEM transmission electron microscopes (FEI Instrumentation Company, Hillsboro, Oregon, USA) operating at 85kV. Photographs were taken using a Veleta integrated Digital Camera (Olympus Soft Imaging Solutions, Munster, Germany) and particles size measured by an Olympus Soft Imaging System (iTEM FEI 5.1.30).

**Table 2s. Main clinical data of the 15 COVID-19 positive patients and their newborns**

| Case                                             | 1           | 2       | 3        | 4                  | 5       | 6            | 7       | 8             | 9        | 10      | 11      | 12      | 13      | 14      | 15      |
|--------------------------------------------------|-------------|---------|----------|--------------------|---------|--------------|---------|---------------|----------|---------|---------|---------|---------|---------|---------|
| <b>Maternal data</b>                             |             |         |          |                    |         |              |         |               |          |         |         |         |         |         |         |
| Age (yrs)                                        | 29          | 35      | 43       | 44                 | 31      | 35           | 39      | 39            | 32       | 42      | 35      | 26      | 39      | 30      | 27      |
| Nationality                                      | Italian     | Italian | Pakistan | Italian            | Italian | Burkina-Fasu | Italian | Italian       | Italian  | Italian | Italian | Marocco | Italian | Italian | Italian |
| Obstetric complications (a)                      | TCP         |         |          | IUGR<br>PIH        |         |              |         | GD            | GD       |         |         |         |         |         |         |
| Gestational age at admission                     | 37+5        | 38+4    | na       | 33+5               | 38+6    | 32+6         | 39+1    | 40            | 40       | 39+1    | 39+4    | 39+1    | 41+2    | 40+1    | 41+3    |
| Comorbidities (a)                                |             |         |          | OB, ATH            | HYT     | OB, CHB, HbC |         | OB            |          |         |         | OB      |         |         | OB      |
| Symptoms (b)                                     | F           | F, C, D |          | F                  | C, AA   | C, D         | F, D    | C, FM, VD     | F, C, AA | F       | F       |         |         |         |         |
| Lymphocytes (c) x 10 <sup>9</sup> /L (0-90-4-00) | 0-68        | 1-87    | 0-99     | 1-38               | 0-75    | 2-18         | 1-25    | 2-01          | 1-54     | 2-17    | 2-27    | 1-89    | 2-29    | 2-92    | 1-38    |
| PCR (mg/L) < 5-0 (c)                             | 12-8        | 169     | 8-4      | 61                 | 116     | 93-2         | 15-8    | 2-9           | 34-1     | na      | na      | 4-7     | 2-7     | 2-4     | 14-1    |
| AST (U/L) (c) (18-34)                            | 22          | 71      | 44       | 76                 | 30      | 582          | 143     | not available | 21       | na      | 23      | 41      | 25      | 13      | na      |
| ALT (U/L)(c) (10-35)                             | 13          | 42      | 42       | 100                | 29      | 964          | 188     | 13            | 26       | na      | 9       | 24      | 15      | 9       | 17      |
| Pneumonia (d)                                    | Yes         | Yes     | No       | Yes                | No      | Yes          | No      | No            | No       | No      | No      | No      | No      | No      | No      |
| Labor Induction                                  | Yes         | No      | No       | No                 | No      | No           | No      | Yes           | Yes      | No      | No      | No      | Yes     | No      | Yes     |
| Severe maternal morbidity (a)                    | TCP.<br>PPH | ARDS    |          |                    |         | ARDS. PPP    |         |               |          | PPH     |         |         |         |         |         |
| <b>Neonatal data</b>                             |             |         |          |                    |         |              |         |               |          |         |         |         |         |         |         |
| Birth weight (gr)                                | 2-840       | 2-840   | 2-850    | 1-499              | 3-066   | 2-159        | 4-150   | 3-400         | 3-190    | 3-520   | 2-660   | 3-850   | 3-390   | 3-200   | 3-210   |
| Stillbirth or neonatal death                     | No          | No      | No       | No                 | No      | No           | No      | No            | No       | No      | No      | No      | No      | No      | No      |
| APGAR score                                      | 9/10        | 9/10    | na       | 8/9                | 9/10    | 1/7          | 9/9     | 9/10          | 9/10     | 9/10    | 9/9     | 9/10    | 9/10    | 9/10    | 9/10    |
| Admission to NICU (days)                         | Yes (18)    | No      | No       | Yes (18)           | Yes (6) | Yes (&)      | No      | No            | No       | No      | No      | No      | No      | No      | No      |
| Severe neonatal morbidity (e)                    | RDS         |         |          | HMD. NH.<br>NI. CH | NI      | HMD. NEC     |         |               |          | PI      |         |         |         |         |         |
| Positive SARS-CoV-2 RT-PCR test                  | Yes         | No      | No       | No                 | No      | No           | No      | No            | No       | No      | No      | No      | No      | No      | No      |

na: not available; (&) still hospitalized after ileal resection for NEC

(a): ARDS: acute respiratory disease syndrome. ATH: autoimmune thyroiditis. CHB: chronic HBV hepatitis. GD: gestational diabetes. HbC: congenital Hemoglobinopathy.

HYT: hypothyroidism. OB: obesity. PIH: pregnancy-induced hypertension. PPH: post-partum hemorrhage. PPP: post-partum preeclampsia. TCP: thrombocytopenia.

(b): AA: ageusia/anosmia. C: cough. D: dyspnea. F: fever. FM: fatigue/malaise. VD: vomiting and diarrhea.

(c): worse value during hospitalization (normal range values);

(d): lung chest Xray or lung echography with features of interstitial pneumonia

(e): HMD: hyaline membrane disease. NEC: necrotizing enterocolitis. NI: neonatal infection. PI: perinatal infection. RDS: respiratory disease syndrome.

**Table 3s. Main clinical data of the 86 COVID-19 negative patients and their newborns**

| Maternal data |          |                              |                               |             | Newborn data    |      |                       |      |                       |    |
|---------------|----------|------------------------------|-------------------------------|-------------|-----------------|------|-----------------------|------|-----------------------|----|
| CASE          | Age (yr) | Morbidities (a)              | NP swab for SARS-CoV2 RNA (b) | Gestat. age | Weight (gr) (b) |      | APGAR (S: stillbirth) |      | Newborn pathology (c) |    |
|               |          |                              |                               |             | N1              | N2   | N1                    | N2   | N1                    | N2 |
| 16            | 33       |                              | ND                            | 38+3        | 3580            |      | 9/9                   |      | MP                    |    |
| 17            | 28       | IUGR, PRM                    | ND                            | 31+4        | NA              |      | 1/intubated           |      | HMD, J, CMV           |    |
| 18            | 41       | CA                           | ND                            | 40+1        | 3920            |      | 9/10                  |      | ECS                   |    |
| 19            | 27       | COL, PPH                     | NEG                           | 36+6        | 2870            | 2660 | 9/10                  | 8/9  |                       | RD |
| 20            | 32       |                              | ND                            | 39          | 2720            |      | 9/10                  |      |                       |    |
| 21            | 30       |                              | ND                            | 36+5        | 2240            | 2470 | 9/10                  | 9/10 |                       |    |
| 22            | 38       | GH                           | ND                            | 37+6        | 3430            |      | 9/10                  |      |                       |    |
| 23            | 41       | PRE                          | ND                            | 34+6        | 2400            |      | 9/9                   |      | HMD, RD               |    |
| 24            | 32       | HYT                          | ND                            | 39+2        | 3730            |      | 9/10                  |      |                       |    |
| 25            | 37       | IUGR                         | NEG                           | 40          | NA              |      | 9/10                  |      |                       |    |
| 26            | 39       |                              | ND                            | 37+4        | 2360            |      | 9/10                  |      |                       |    |
| 27            | 28       |                              | ND                            | 41+2        | 2650            |      | 4/7                   |      |                       |    |
| 28            | 28       | PRE, IUGR                    | ND                            | 35+4        | 2200            |      | 9/9                   |      |                       |    |
| 29            | 25       |                              | ND                            | 40+3        | 3078            |      | 7/8                   |      |                       |    |
| 30            | 34       |                              | ND                            | 41+3        | 3260            |      | 9/10                  |      |                       |    |
| 31            | 43       | VP                           | ND                            | 36+3        | 2940            |      | 9/10                  |      |                       |    |
| 32            | 39       |                              | ND                            | 41+2        | 3548            |      | 9/10                  |      |                       |    |
| 33            | 41       |                              | ND                            | 36+4        | 2190            | 2400 | 9/10                  | 9/10 |                       |    |
| 34            | 28       | O                            | ND                            | 37+5        | 1682            |      | S                     |      |                       |    |
| 35            | 31       | DG , TPB                     | ND                            | 27+6        | 1215            |      | 9/9                   |      | J, RD                 |    |
| 36            | 34       |                              | ND                            | 39          | 4540            |      | 9/10                  |      |                       |    |
| 37            | 41       | DM, CHT, PRE, HIV, NP, IUGR, | ND                            | 29          | 1160            |      | NA                    |      |                       |    |
| 38            | 35       |                              | NEG                           | 39+4        | 3060            |      | 9/10                  |      |                       |    |
| 39            | 39       |                              | ND                            | 37+3        | 2600            | 2640 | 9/9                   | 9/9  |                       |    |
| 40            | 28       |                              | ND                            | 41+3        | 3660            |      | 3/6                   |      |                       |    |
| 41            | 30       |                              | NEG                           | 39+3        | 3440            |      | 9/10                  |      |                       |    |
| 42            | 34       | AIAD, HYT, GH                | ND                            | 37          | 2880            |      | 9/10                  |      |                       |    |
| 43            | 27       | OB, GH                       | NEG                           | 39+2        | 2900            |      | 9/10                  |      |                       |    |
| 44            | 33       | COL                          | ND                            | 35+3        | 2580            | 2360 | 9/9                   | 9/9  |                       |    |
| 45            | 44       | TB                           | ND                            | 35+5        | 2730            |      | 9/10                  |      |                       |    |
| 46            | 25       |                              | ND                            | 37+4        | 2410            | 2460 | 9/9                   | 9/10 |                       |    |
| 47            | 31       |                              | ND                            | 40+6        | 3570            |      | 8/8                   |      |                       |    |
| 48            | 34       | PRE                          | ND                            | 35          | 1878            |      | 9/10                  |      |                       |    |
| 49            | 38       |                              | ND                            | 38+2        | 3224            |      | 9/9                   |      |                       |    |

| Maternal data    |             |                      |                                            |                | Newborn data       |      |                          |      |                          |        |
|------------------|-------------|----------------------|--------------------------------------------|----------------|--------------------|------|--------------------------|------|--------------------------|--------|
| C<br>A<br>S<br>E | Age<br>(yr) | Morbidities<br>(a)   | NP swab<br>for SARS-<br>CoV2<br>RNA<br>(b) | Gestat.<br>age | Weight (gr)<br>(b) |      | APGAR<br>(S: stillbirth) |      | Newborn pathology<br>(c) |        |
|                  |             |                      |                                            |                | N1                 | N2   | N1                       | N2   | N1                       | N2     |
| 50               | 36          |                      | ND                                         | 39+5           | 4630               |      | 9/9                      |      |                          |        |
| 51               | 27          | GH, IUGR             | NEG                                        | 32+1           | 997                |      | 8/9                      |      |                          |        |
| 52               | 44          | HYT, TB              | ND                                         | 34+2           | 1860               |      | 6/8                      |      | HMD                      |        |
| 53               | 29          | GD, PF               | ND                                         | 35+1           | NA                 |      | NA                       |      | PD                       |        |
| 54               | 23          | IUGR                 | ND                                         | 38+3           | 2306               |      | 9/9                      |      |                          |        |
| 55               | 25          | GD                   | ND                                         | 31+5           | 1456               |      | NA                       |      |                          |        |
| 56               | 37          |                      | ND                                         | 41             | 4020               |      | 9/9                      |      |                          |        |
| 57               | 32          | CHT<br>HYT, IUGR     | ND                                         | 32+4           | 1700               | 1880 | 9/10                     | 7/9  |                          |        |
| 58               | 32          |                      | ND                                         | 41+4           | 2970               |      | 9/10                     |      |                          |        |
| 59               | 35          |                      | ND                                         | 37+4           | 2300               |      | 8/9                      |      |                          | HMD    |
| 60               | 22          | IUGR                 | ND                                         | 32+1           | 1484               | 1657 | 7/8                      | 8/8  |                          | RD     |
| 61               | 38          | O, SGA               | ND                                         | 37+3           | 1880               |      | 9/9                      |      |                          |        |
| 62               | 39          | DM, CHT,<br>OB, IUGR | ND                                         | 34             | 2082               |      | 9/10                     |      |                          |        |
| 63               | 36          | CMV-s                | ND                                         | 39             | 2840               |      | 9/10                     |      |                          |        |
| 64               | 41          | IUGR                 | ND                                         | 33+5           | 1180               |      | 9/9                      |      |                          |        |
| 65               | 39          | PRE                  | NEG                                        | 31+2           | 1310               |      | 5/8                      |      | HMD                      |        |
| 66               | 34          | GD                   | ND                                         | 32+2           | 1880               | 1770 | 8/7                      | 8/9  | HMD                      | HMD    |
| 67               | 34          |                      | ND                                         | 37+6           | 2470               |      | 10/10                    |      |                          |        |
| 68               | 37          | EP                   | ND                                         | 36             | 2710               |      | 9/9                      |      |                          |        |
| 69               | 41          | MPP                  | ND                                         | 36+6           | NA                 |      | NA                       |      |                          |        |
| 70               | 24          |                      | ND                                         | 37+3           | 2472               | 2720 | 9/10                     | 9/10 |                          |        |
| 71               | 30          |                      | NEG                                        | 37+1           | 2618               | 2356 | 9/10                     | 9/9  |                          |        |
| 72               | 24          |                      | NEG                                        | 39+3           | 3100               |      | 10/10                    |      |                          |        |
| 73               | 30          | MPP                  | ND                                         | 28+5           | 840                | 1000 | 7/9                      | 6/7  |                          |        |
| 74               | 28          | GH, IUGR             | NEG                                        | 36+3           | 1890               |      | 9/9                      |      |                          |        |
| 75               | 26          | IUGR                 | NEG                                        | 34+4           | 1690               | 1650 | 5/8                      | 5/8  | HMD                      | HMD, J |
| 76               | 41          | IUGR, T21            | ND                                         | 32+3           | NA                 |      | S                        |      |                          |        |
| 77               | 22          |                      | ND                                         | 41+2           | 3320               |      | 7/9                      |      |                          |        |
| 78               | 30          | O, TOX-s             | NEG                                        | 39             | 3250               |      | 9/9                      |      |                          |        |
| 79               | 41          |                      | ND                                         | 36+2           | 3400               |      | 9/10                     |      |                          |        |
| 80               | 38          |                      | NEG                                        | 39             | NA                 |      | 9/9                      |      |                          |        |
| 81               | 37          | HYT                  | NEG                                        | 39             | 3300               |      | 9/10                     |      |                          |        |
| 82               | 32          | O, TTS               | NEG                                        | 27             | 1170               | 750  | 5/7                      | 2/0  |                          | PD     |
| 83               | 29          | HYT                  | NEG                                        | 35+3           | 2860               | 2960 | 9/10                     | 8/9  |                          |        |
| 84               | 39          | PRE                  | NEG                                        | 33+3           | 1660               |      | 9/9                      |      | HMD                      |        |
| 85               | 30          | MPP                  | NEG                                        | 29+5           | 1225               |      | 5/9                      |      |                          |        |
| 86               | 20          | O, FM                | NEG                                        | 40+5           | NA                 |      | NA                       | 0    |                          |        |
| 87               | 36          | MPP                  | NEG                                        | 28+6           | 998                | 1130 | 1/intubated              | 6/9  |                          |        |
| 88               | 30          | PRE                  | NEG                                        | 34+2           | 1600               |      | 4/9                      |      |                          |        |

| Maternal data    |             |                      |                                            |                | Newborn data       |      |                          |      |                          |    |
|------------------|-------------|----------------------|--------------------------------------------|----------------|--------------------|------|--------------------------|------|--------------------------|----|
| C<br>A<br>S<br>E | Age<br>(yr) | Morbidities<br>(a)   | NP swab<br>for SARS-<br>CoV2<br>RNA<br>(b) | Gestat.<br>age | Weight (gr)<br>(b) |      | APGAR<br>(S: stillbirth) |      | Newborn pathology<br>(c) |    |
|                  |             |                      |                                            |                | N1                 | N2   | N1                       | N2   | N1                       | N2 |
| <b>89</b>        | 39          | NP, CHT,<br>PRE, PKD | NEG                                        | 36             | 2070               | 2570 | 9/9                      | 9/9  |                          |    |
| <b>90</b>        | 26          | CHT, GD              | NEG                                        | 37             | 2500               |      | 8/9                      |      |                          |    |
| <b>91</b>        | 21          | HYT                  | NEG                                        | 33+6           | 2520               | 2480 | 9/10                     | 7/8  |                          | RD |
| <b>92</b>        | 40          | PREP                 | NEG                                        | 37+1           | 2610               | 2350 | 9/10                     | 9/10 |                          |    |
| <b>93</b>        | 40          | HYT, MPP,<br>PRM     | NEG                                        | 34+4           | 1340               |      | 6/9                      |      |                          |    |
| <b>94</b>        | 35          |                      | NEG                                        | 38+4           | 2820               |      | 9/10                     |      |                          |    |
| <b>95</b>        | 28          | GH                   | NEG                                        | 39             | 3010               |      | 9/10                     |      |                          |    |
| <b>96</b>        | 30          | O, TOX-s             | NEG                                        | 41+1           | 3160               |      | 9/10                     |      |                          |    |
| <b>97</b>        | 34          | O, PP                | NEG                                        | 31+4           | 1670               |      | 9/9                      |      |                          |    |
| <b>98</b>        | 24          | CHT, OB, GD          | NEG                                        | 37+4           | 2280               | 2570 | 7/9                      | 9/9  |                          |    |
| <b>99</b>        | 39          |                      | NEG                                        | 41+1           | 3150               |      | 9/9                      |      |                          |    |
| <b>100</b>       | 46          | O, DC                | NEG                                        | 32+1           | 1660               | 1410 | 8/9                      | 9/9  |                          |    |
| <b>101</b>       | 32          | O, SS, TCP,<br>IUGR  | NEG                                        | 37             | 2060               |      | 9/10                     |      |                          |    |

a) AIAD: alpha-1-antitrypsin deficiency, CA: chorioamniosis, COL: cholestasis, CHT: chronic hypertension, CMV-s: Cytomegalovirus seroconversion, DC: doppler changes, DM: diabetes mellitus, EP: epilepsy, FM: fetus malformations, GD: gestational diabetes, GH: gestational hypertension, HYT: hypothyroidism, IUGR, intrauterine growth restriction, MPP: major placenta previa, NP: nephropathy, O: others, OB: obesity, PRE preeclampsia, PPH: postpartum hemorrhage, PKD: polycystic kidney disease, PREP: preeclampsia in puerperium, PP: placenta previa, PRM: preterm rupture of membranes, SGA, small for gestational age; SS: Savage syndrome, TB: thrombophilia, T21: trisomy 21, TCP: thrombocytopenia, TPB: preterm birth threatens, TOX-s: Toxoplasma seroconversion, TTS: twin-twin syndrome, VP: vasa previa.

b) ND: not done, NEG: negative, NA: not available

c) ECS: *E. coli* sepsis; HMD: hyaline membrane diseases, J: jaundice, MP: meconium peritonitis, PD: perinatal death, RD: respiratory distress.



1. Table 4s. Main morphological changes observed in the 86 non COVID-19 placentas. Black and grey rectangles indicate the main and minor findings, respectively. MVM: Maternal Vascular Malperfusion. MPFD: Massive Perivillous Fibrin Deposition; FVM: Fetal Vascular Malperfusion; AIP: Acute Inflammatory Pathology; CIP: Chronic Inflammatory Pathology. <sup>5,6</sup>

|    | MVM | Infarcts | Accelerated villous maturation | Decidual arteriopathy | Retroplacental hematoma | Intervillous hematoma | Marginal infarct | Subchorial hematoma | MPFD | FVM | Delayed villous maturation | Chorangiosis | Chorangiomas | Chorionic vessel trombus | AIP | Chorioamnionitis acute | Chorionic vasculitis | Funisitis | CIP | Chronic villitis or chronic villitis and intervillousitis | Deciduitis |
|----|-----|----------|--------------------------------|-----------------------|-------------------------|-----------------------|------------------|---------------------|------|-----|----------------------------|--------------|--------------|--------------------------|-----|------------------------|----------------------|-----------|-----|-----------------------------------------------------------|------------|
| 16 |     |          |                                |                       |                         |                       |                  |                     |      |     |                            |              |              |                          |     |                        |                      |           |     |                                                           |            |
| 17 |     |          |                                |                       |                         |                       |                  |                     |      |     |                            |              |              |                          |     |                        |                      |           |     |                                                           |            |
| 18 |     |          |                                |                       |                         |                       |                  |                     |      |     |                            |              |              |                          |     |                        |                      |           |     |                                                           |            |
| 19 |     |          | ■                              |                       |                         |                       |                  |                     |      |     |                            |              |              |                          |     | ■                      |                      | ■         |     |                                                           |            |
| 20 |     |          |                                |                       |                         | ■                     |                  |                     |      |     |                            |              |              |                          |     |                        |                      |           |     |                                                           |            |
| 21 |     |          |                                |                       |                         |                       | ■                |                     |      |     |                            |              |              |                          |     |                        |                      |           |     |                                                           |            |
| 22 |     |          |                                |                       |                         |                       |                  |                     |      |     |                            | ■            |              |                          |     |                        |                      |           |     |                                                           |            |
| 23 |     | ■        |                                |                       |                         |                       |                  |                     |      |     |                            |              |              |                          |     |                        |                      |           |     |                                                           |            |
| 24 |     |          |                                |                       |                         |                       |                  |                     | ■    |     |                            |              |              |                          |     |                        |                      |           |     |                                                           |            |
| 25 |     |          |                                |                       |                         |                       |                  |                     |      |     |                            | ■            |              |                          |     |                        |                      |           |     |                                                           |            |
| 26 |     |          |                                |                       | ■                       |                       |                  | ■                   |      |     |                            |              |              |                          |     |                        |                      |           |     |                                                           |            |
| 27 |     |          |                                |                       |                         |                       |                  |                     |      |     |                            |              |              |                          |     |                        |                      |           |     |                                                           |            |
| 28 |     | ■        |                                | ■                     |                         |                       |                  |                     |      |     |                            |              |              |                          |     |                        |                      |           |     |                                                           |            |
| 29 |     |          |                                |                       |                         |                       |                  |                     |      |     |                            |              |              |                          |     |                        |                      |           |     |                                                           | ■          |
| 30 |     | ■        |                                |                       |                         | ■                     |                  |                     |      |     |                            |              |              |                          |     |                        | ■                    |           |     |                                                           |            |
| 31 |     |          |                                |                       |                         |                       |                  |                     |      |     |                            |              |              |                          |     |                        |                      |           |     |                                                           |            |
| 32 |     |          |                                |                       |                         |                       |                  |                     |      |     |                            |              |              |                          |     |                        |                      |           |     |                                                           | ■          |
| 33 |     |          |                                |                       | ■                       |                       |                  |                     |      |     |                            |              |              |                          |     |                        |                      |           |     |                                                           |            |
| 34 |     |          |                                |                       |                         |                       |                  |                     |      |     |                            |              |              |                          |     |                        |                      |           |     |                                                           |            |
| 35 |     |          |                                |                       |                         |                       |                  |                     |      |     |                            |              |              |                          |     |                        |                      |           |     |                                                           |            |
| 36 |     |          | ■                              |                       |                         |                       |                  |                     |      |     |                            |              |              |                          |     |                        |                      |           |     |                                                           |            |
| 37 |     |          |                                |                       |                         |                       |                  |                     |      |     |                            |              | ■            |                          |     |                        |                      |           |     |                                                           |            |
| 38 |     |          |                                |                       |                         |                       |                  |                     | ■    |     |                            |              |              |                          |     |                        |                      |           |     |                                                           |            |
| 39 |     |          | ■                              |                       |                         |                       |                  |                     |      |     |                            |              | ■            |                          |     |                        |                      |           |     |                                                           |            |
| 40 |     |          |                                |                       |                         |                       | ■                |                     |      | ■   |                            |              |              |                          |     |                        |                      |           |     |                                                           |            |
| 41 |     |          | ■                              |                       |                         |                       |                  |                     |      |     | ■                          |              |              |                          |     |                        |                      |           |     |                                                           |            |
| 42 |     |          |                                |                       |                         |                       |                  |                     | ■    |     |                            |              |              |                          |     |                        |                      | ■         |     |                                                           | ■          |
| 43 |     |          |                                |                       |                         |                       |                  |                     |      |     |                            |              |              |                          |     |                        |                      |           |     |                                                           |            |
| 44 |     |          | ■                              |                       |                         |                       |                  |                     |      |     |                            | ■            |              |                          |     |                        |                      |           |     |                                                           |            |
| 45 |     |          |                                |                       |                         |                       | ■                |                     |      |     |                            |              |              |                          |     |                        |                      |           |     |                                                           |            |
| 46 |     |          | ■                              |                       |                         |                       |                  |                     | ■    |     |                            | ■            |              |                          |     |                        |                      |           |     |                                                           |            |
| 47 |     |          |                                |                       |                         | ■                     |                  |                     |      |     |                            |              |              |                          |     | ■                      |                      |           |     |                                                           |            |

|    | MVM | Infarcts | Accelerated villous maturation | Decidual arteriopathy | Retroplacental hematoma | Intervillous hematoma | Marginal infarct | Subchorial hematoma | MPFD | FVM | Delayed villous maturation | Chorangiosis | Chorangiomas | Chorionic vessel trombus | AIP | Chorioamnionitis acute | Chorionic vasculitis | Funisitis | CIP | Chronic villitis or chronic villitis and intervillousitis | Deciduitis |   |
|----|-----|----------|--------------------------------|-----------------------|-------------------------|-----------------------|------------------|---------------------|------|-----|----------------------------|--------------|--------------|--------------------------|-----|------------------------|----------------------|-----------|-----|-----------------------------------------------------------|------------|---|
| 48 |     | ■        |                                |                       |                         | ■                     |                  |                     | ■    |     |                            |              |              |                          |     |                        |                      |           |     |                                                           |            |   |
| 49 |     | ■        |                                |                       |                         | ■                     | ■                |                     |      |     |                            |              |              |                          |     |                        |                      |           |     |                                                           |            |   |
| 50 |     | ■        |                                |                       |                         |                       | ■                |                     |      |     |                            |              |              |                          |     |                        |                      |           |     |                                                           |            |   |
| 51 |     | ■        |                                |                       |                         |                       |                  |                     |      |     |                            |              |              |                          |     |                        |                      |           |     |                                                           |            | ■ |
| 52 |     |          |                                |                       |                         |                       | ■                |                     | ■    |     |                            |              |              |                          |     |                        |                      |           |     |                                                           |            | ■ |
| 53 |     |          |                                |                       |                         |                       |                  |                     |      |     |                            |              |              |                          |     |                        |                      |           |     |                                                           | ■          |   |
| 54 |     |          |                                |                       |                         |                       |                  |                     |      |     |                            |              |              |                          |     | ■                      | ■                    | ■         |     |                                                           |            |   |
| 55 |     |          |                                |                       |                         |                       |                  |                     |      |     |                            |              |              |                          |     | ■                      | ■                    | ■         |     |                                                           |            |   |
| 56 |     |          |                                |                       |                         |                       |                  |                     |      |     |                            |              |              |                          |     | ■                      | ■                    | ■         |     |                                                           |            |   |
| 57 |     |          | ■                              |                       |                         | ■                     |                  |                     |      |     |                            | ■            |              |                          |     |                        |                      |           |     |                                                           |            |   |
| 58 |     | ■        |                                |                       |                         |                       | ■                |                     |      |     |                            |              | ■            |                          |     |                        |                      |           |     |                                                           |            |   |
| 59 |     |          | ■                              | ■                     |                         |                       |                  |                     |      |     |                            |              |              |                          |     |                        |                      |           |     |                                                           |            |   |
| 60 |     |          | ■                              |                       |                         |                       | ■                |                     |      |     |                            |              |              |                          |     |                        |                      |           |     |                                                           |            |   |
| 61 |     |          |                                |                       |                         | ■                     |                  |                     |      |     |                            |              |              |                          |     |                        |                      |           |     |                                                           | ■          |   |
| 62 |     |          |                                |                       |                         |                       |                  |                     | ■    |     |                            | ■            |              |                          |     |                        |                      |           |     |                                                           | ■          | ■ |
| 63 |     |          |                                |                       |                         |                       |                  |                     |      |     |                            |              |              |                          |     |                        |                      |           |     |                                                           | ■          |   |
| 64 |     |          | ■                              |                       |                         |                       | ■                |                     |      |     |                            |              |              |                          |     |                        |                      |           |     |                                                           |            |   |
| 65 |     | ■        |                                |                       |                         | ■                     |                  |                     |      |     |                            |              |              |                          |     |                        | ■                    |           |     |                                                           |            | ■ |
| 66 |     |          | ■                              |                       |                         |                       |                  |                     |      |     |                            |              |              |                          |     |                        |                      |           |     |                                                           |            |   |
| 67 |     |          |                                |                       |                         |                       |                  | ■                   | ■    |     |                            |              |              |                          |     |                        |                      |           |     |                                                           |            |   |
| 68 |     |          |                                |                       |                         | ■                     |                  |                     |      |     |                            | ■            |              |                          |     |                        |                      |           |     |                                                           |            |   |
| 69 |     |          |                                |                       |                         |                       |                  |                     |      |     | ■                          |              |              |                          |     |                        |                      |           |     |                                                           |            |   |
| 70 |     |          |                                |                       |                         |                       |                  |                     | ■    |     |                            |              |              |                          |     |                        |                      |           |     |                                                           |            |   |
| 71 |     | ■        |                                |                       |                         |                       |                  |                     |      |     |                            | ■            |              |                          |     |                        |                      |           |     |                                                           |            |   |
| 72 |     |          |                                |                       |                         |                       |                  |                     |      |     |                            |              |              |                          |     |                        | ■                    |           |     |                                                           |            |   |
| 73 |     |          | ■                              |                       |                         |                       |                  |                     |      |     |                            |              |              |                          |     |                        |                      |           |     |                                                           |            |   |
| 74 |     |          |                                |                       |                         |                       |                  |                     |      |     |                            |              |              |                          |     |                        | ■                    | ■         |     |                                                           |            | ■ |
| 75 |     |          |                                |                       |                         |                       |                  |                     | ■    | ■   |                            |              |              |                          |     |                        | ■                    | ■         |     |                                                           |            |   |
| 76 |     |          |                                |                       |                         |                       |                  | ■                   | ■    |     |                            |              |              |                          |     |                        |                      |           |     |                                                           |            |   |
| 77 |     |          | ■                              |                       |                         |                       |                  |                     |      |     |                            |              |              |                          |     |                        |                      |           |     |                                                           |            |   |
| 78 |     |          |                                |                       |                         |                       |                  |                     | ■    |     |                            |              |              |                          |     | ■                      | ■                    | ■         |     |                                                           |            | ■ |
| 79 |     |          |                                |                       | ■                       |                       | ■                |                     | ■    |     |                            |              |              |                          |     | ■                      | ■                    | ■         |     |                                                           |            |   |
| 80 |     |          | ■                              |                       |                         |                       |                  |                     |      |     |                            |              |              |                          |     |                        |                      |           |     |                                                           |            |   |
| 81 |     |          |                                |                       |                         |                       |                  |                     | ■    |     |                            |              |              |                          |     |                        |                      |           |     |                                                           |            |   |
| 82 |     |          | ■                              |                       |                         |                       |                  |                     | ■    |     |                            |              |              |                          |     |                        |                      |           |     |                                                           |            |   |
| 83 |     |          |                                |                       |                         |                       |                  |                     |      |     |                            | ■            |              |                          |     |                        |                      | ■         |     |                                                           |            |   |
| 84 |     |          |                                |                       |                         | ■                     |                  |                     | ■    |     |                            | ■            |              |                          |     |                        |                      |           |     |                                                           |            |   |
| 85 |     |          |                                |                       |                         |                       |                  |                     | ■    |     |                            |              |              |                          |     |                        |                      |           |     |                                                           |            |   |
| 86 |     |          |                                |                       |                         |                       | ■                | ■                   | ■    |     |                            |              |              |                          |     |                        |                      |           |     |                                                           |            |   |
| 87 |     |          |                                |                       |                         |                       |                  |                     | ■    |     |                            |              |              |                          |     |                        |                      |           |     |                                                           |            |   |

|              | MVM | Infarcts | Accelerated villous maturation | Decidual arteriopathy | Retroplacental hematoma | Intervillous hematoma | Marginal infarct | Subchorial hematoma | MPFD | FVM | Delayed villous maturation | Chorangiomas | Chorangiomas | Chorionic vessel thrombus | AIP | Chorioamnionitis acute | Chorionic vasculitis | Funisitis | CIP | Chronic villitis or chronic villitis and intervillousitis | Deciduitis |   |
|--------------|-----|----------|--------------------------------|-----------------------|-------------------------|-----------------------|------------------|---------------------|------|-----|----------------------------|--------------|--------------|---------------------------|-----|------------------------|----------------------|-----------|-----|-----------------------------------------------------------|------------|---|
| 88           |     | ■        |                                |                       |                         |                       |                  |                     |      |     |                            |              |              |                           |     |                        |                      |           |     |                                                           |            |   |
| 89           |     |          |                                |                       |                         |                       |                  |                     | ■    |     |                            |              |              |                           |     |                        |                      |           |     |                                                           |            |   |
| 90           |     |          | ■                              |                       |                         |                       |                  |                     |      |     |                            | ■            |              |                           |     |                        |                      |           |     |                                                           |            |   |
| 91           |     |          |                                |                       |                         |                       |                  | ■                   | ■    |     |                            |              |              |                           |     |                        |                      |           |     |                                                           |            |   |
| 92           |     |          | ■                              |                       |                         |                       |                  |                     | ■    |     |                            |              |              |                           |     |                        |                      |           |     |                                                           |            |   |
| 93           |     |          | ■                              |                       |                         |                       |                  |                     | ■    |     |                            |              |              |                           |     |                        |                      |           |     |                                                           |            |   |
| 94           |     |          | ■                              |                       |                         |                       |                  |                     | ■    |     |                            |              |              |                           |     |                        |                      |           |     |                                                           |            |   |
| 95           |     | ■        |                                |                       |                         |                       |                  | ■                   |      |     |                            |              |              |                           |     |                        |                      |           |     |                                                           |            |   |
| 96           |     | ■        | ■                              |                       |                         |                       |                  |                     | ■    |     |                            |              |              |                           |     |                        |                      |           |     |                                                           |            |   |
| 97           |     |          |                                |                       |                         |                       |                  |                     |      |     |                            |              |              |                           |     | ■                      |                      |           |     |                                                           |            |   |
| 98           |     |          |                                |                       |                         |                       |                  |                     | ■    |     |                            | ■            |              |                           |     |                        |                      |           |     |                                                           |            |   |
| 99           |     |          |                                |                       |                         |                       |                  |                     |      |     |                            |              |              |                           |     |                        |                      |           |     |                                                           | ■          |   |
| 100          |     |          | ■                              |                       |                         |                       |                  |                     |      |     |                            |              |              |                           |     |                        |                      |           |     |                                                           |            |   |
| 101          |     |          |                                |                       |                         |                       |                  |                     |      |     |                            |              |              |                           |     | ■                      |                      |           |     |                                                           | ■          | ■ |
| <b>Total</b> |     | 11       | 22                             | 4                     | 3                       | 12                    | 11               | 5                   | 25   |     | 2                          | 13           | 1            | 1                         |     | 17                     | 9                    | 10        |     | 7                                                         | 7          |   |



**Supplementary Figure 1. SARS-Cov-2 infected placenta: gross macroscopy, histological and immunohistochemical features of the inflammatory infiltrate and damaged villi.**

(A). Cut surface of the placenta: the dark brown chorionic parenchyma contains multiple small whitish areas. (B, C). Intervillous inflammation with marked deposits of fibrin. Villi are relatively preserved in some areas (B), more damaged and necrotic in others (C). (D) Intervillous inflammatory cells are composed of monocyte-macrophages and mature and immature (band) neutrophils. (E) For comparison normal villi in the same placenta in areas uninvolvement by the inflammation (B-C-D-E: haematoxylin and eosin stain). (F, G). Double immunostain for cytokeratin (brown) and CD34 (blue): cytokeratin stain show villi involved by inflammation with thinning or discontinuity of the syncytiotrophoblast cell layer (F), compared with normal villi of the same placenta (G).

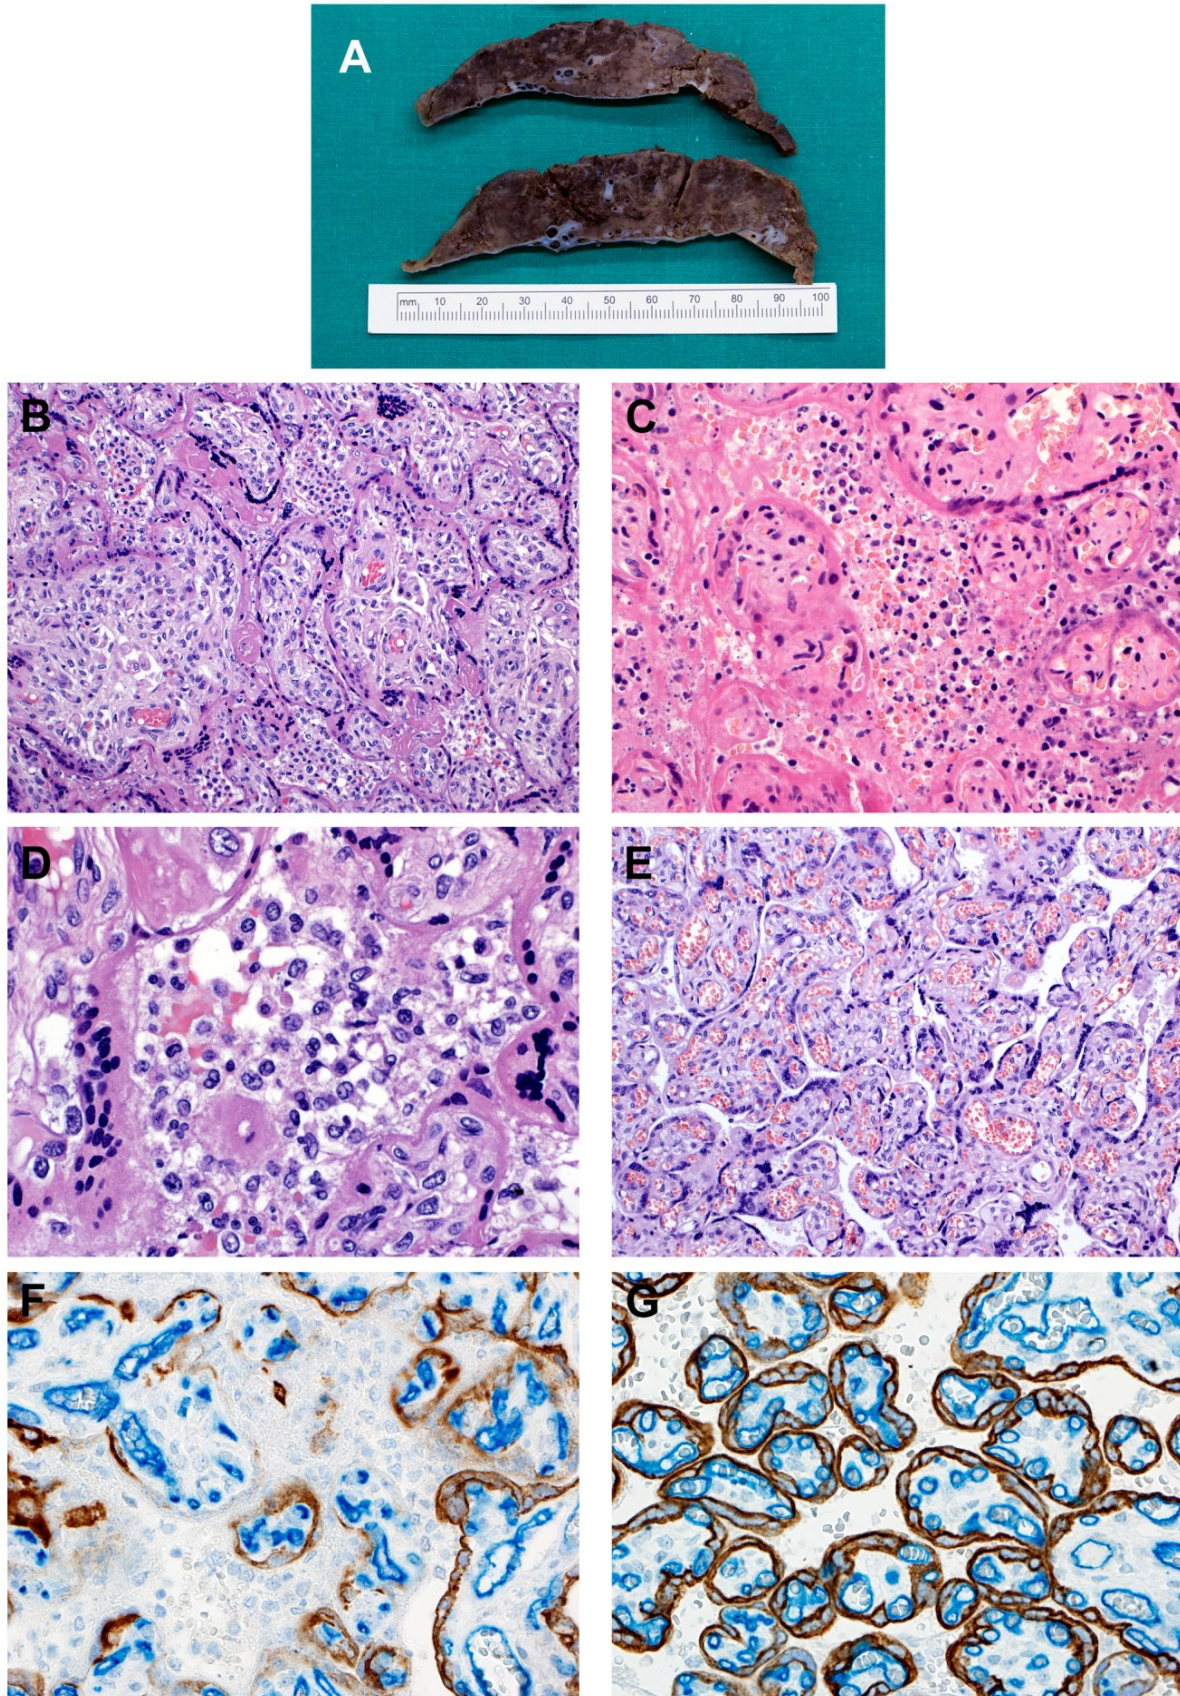



**Supplementary Figure 2. Immunostains for the inflammatory cells, Hofbauer cells, platelets and megakariocytes.**  
 (A, B). Very few lymphoid T-cells (A, immunostain for CD3), B-cells (B, immunostain for CD20) occurred in the placenta. (C and inset) The CD14+ monocyte-macrophages are partially activated and coexpress myeloperoxidase. (double stain for CD14 (blue) and myeloperoxidase (brown)). (D) Neutrophils are composed by immature cells (CD10-, CD66b+, arrows) and mature cells (CD10+, CD66b+). Note positivity of the syncytiotrophoblast for CD10 (Neutral endopeptidase)<sup>7</sup> (double stain for CD10 (brown) and CD66b (blue)). (E, F). CD163 stain shows the striking difference in the number of Hofbauer cells in Case-1 placenta (E) and in a control (F). (G) Diffuse perivillous deposition of platelets detected by anti-CD61. (H) Examples of intracapillary megakariocytes, whose cytoplasm is stained with anti-CXCR4 (brown); endothelial cells are stained with anti-CD34 (blue).

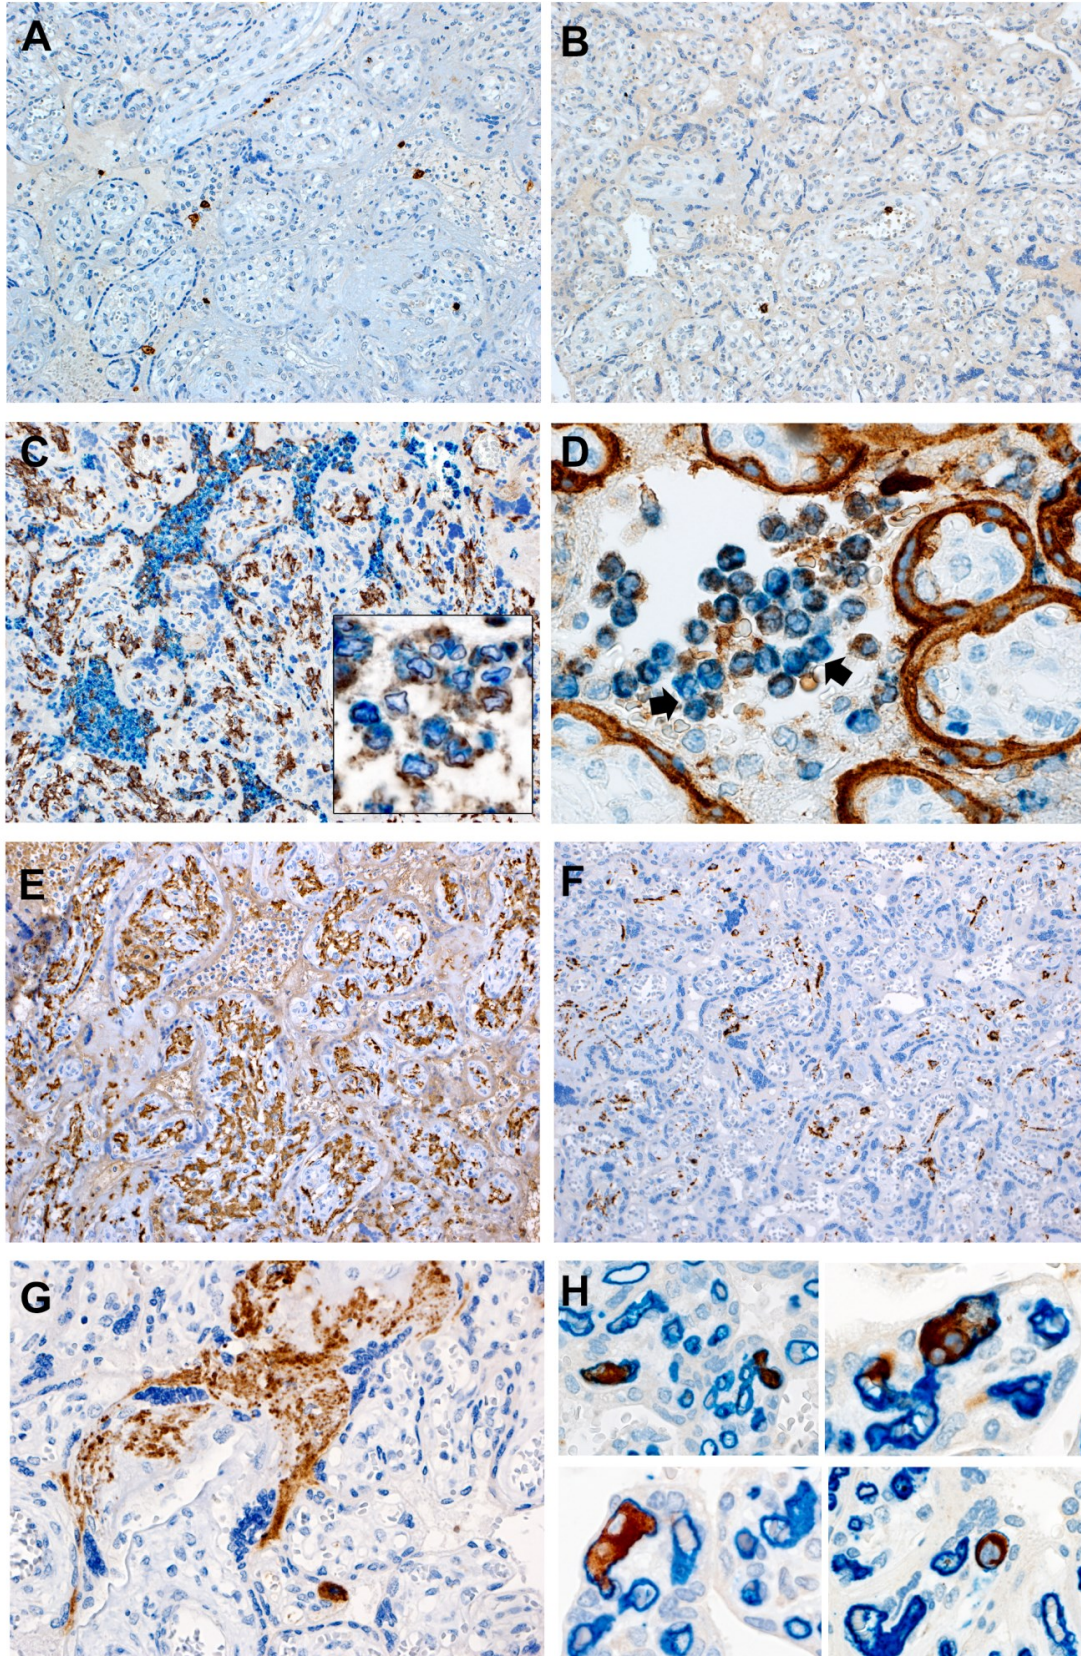



**Supplementary Figure 3. A case of placenta from a COVID-19 positive woman (Case#15) showing histiocytic intervillitis and villitis.**

Haematoxylin-eosin stain showing a focus of intervillitis (A), that contains numerous CD163 positive monocyte-macrophages (B) and a negligible number of CD66b positive neutrophils (C). CD3+ T lymphocytes are also found in the inflammatory infiltrate as well as in the villus stroma (D).

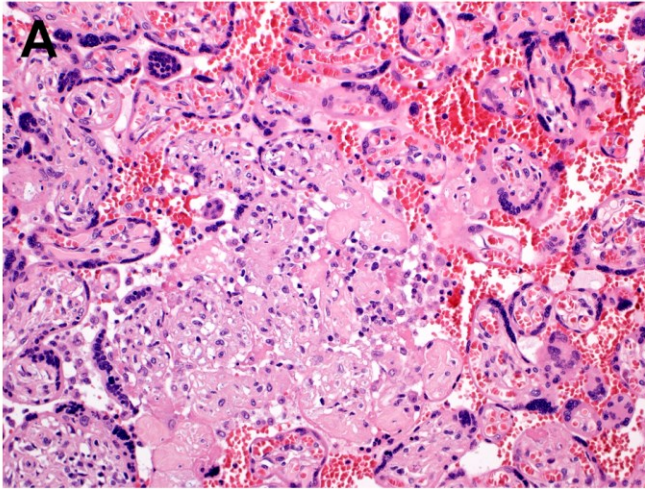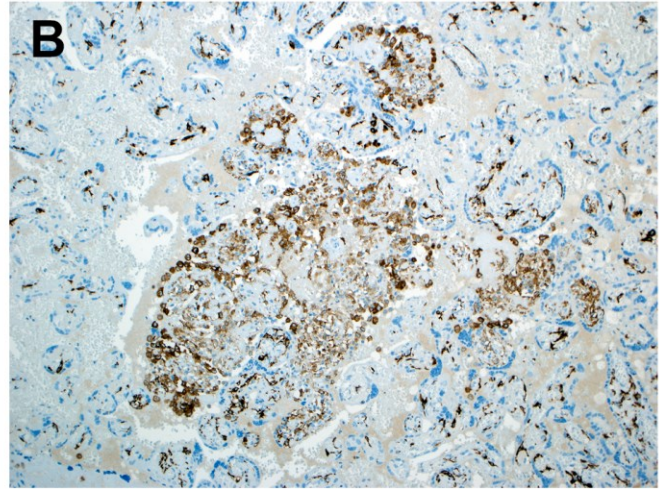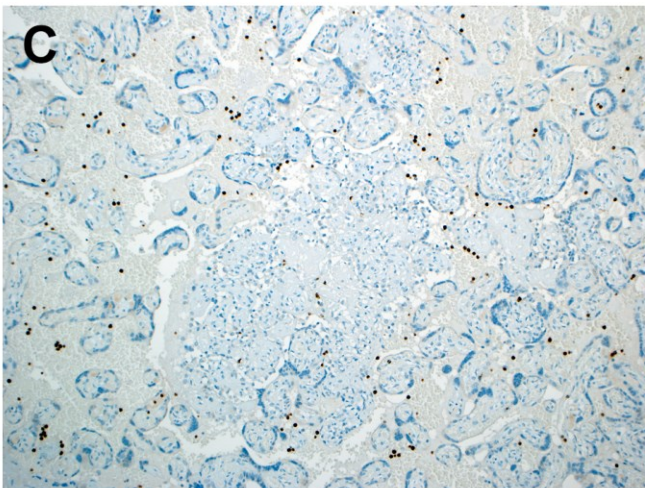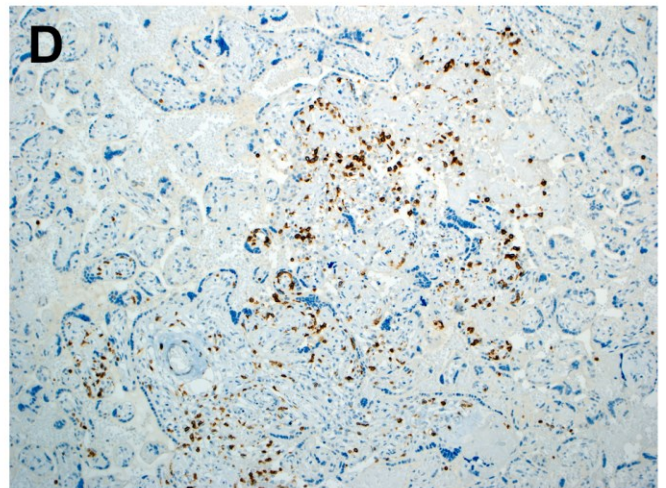

**Supplementary Figure 4. Double immunofluorescence for NETs detection**

Representative double-marker immunofluorescence microphotographs highlighting the presence of DAPI (white) and H3 cit histone (turquoise) threads associated with MPO-expressing (red) elements, indicative of NET formation (arrows). Original magnification x630

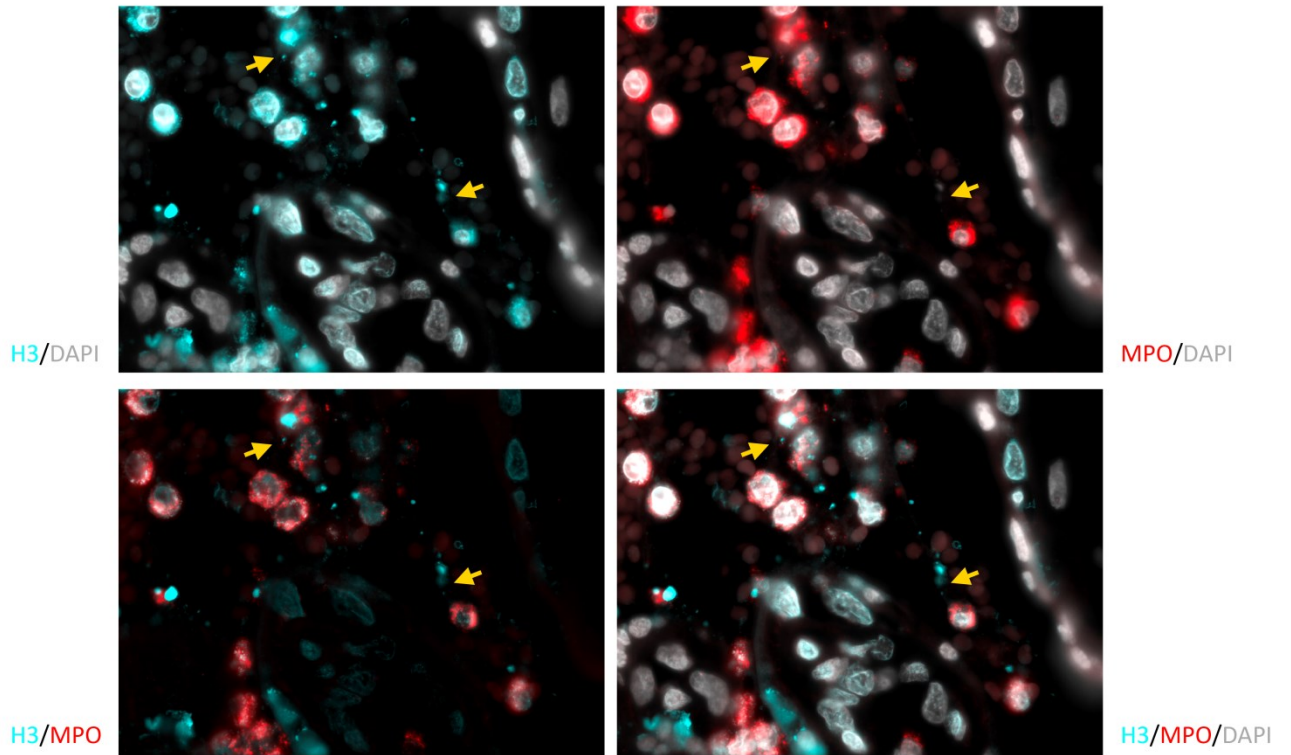

**Supplementary Figure 5. Electron microscopy of SARS-2-CoV-2 virus in the infected placenta.**

(A) Negative stain electron micrograph of a cluster of viral particles. (Bar 100 nm).

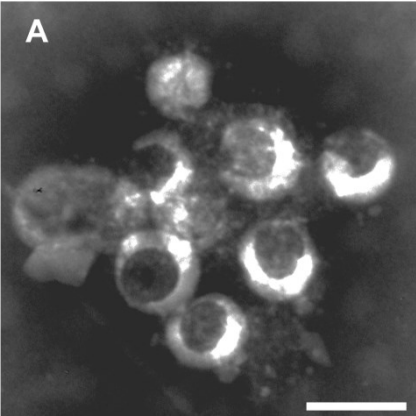



## REFERENCES

1. Cigognetti M, Lonardi S, Fisogni S, Balzarini P, Pellegrini V, Tironi A, et al. BAP1 (BRCA1-associated protein 1) is a highly specific marker for differentiating mesothelioma from reactive mesothelial proliferations. *Mod Pathol*. 2015; **28**:1043-57.
2. Corman V, Bleicker D, Brünink S, Drosten C. First case of placental infection with SARS-CoV-2 Diagnostic detection of 2019-nCoV by real-time RT-PCR [Internet]. 2020. Available from: [https://www.who.int/docs/default-source/coronaviruse/protocol-v2-1.pdf?sfvrsn=a9ef618c\\_2](https://www.who.int/docs/default-source/coronaviruse/protocol-v2-1.pdf?sfvrsn=a9ef618c_2) Accessed on June 09, 2020
3. Lavazza A, Pascucci S, Gelmetti D. Rod-shaped virus-like particles in intestinal contents of three avian species. *Vet Rec*. 1990; **126**:581.
4. Capucci L, Scicluna MT, Lavazza A. Diagnosis of viral haemorrhagic disease of rabbits and the European brown hare syndrome. *Rev Sci Tech*. 1991; **10**:347-70.
5. Ernst LM, Sheata BM, McKay E, Chisholm K, Katzman P, Linn R, et al. Diagnostic Pathology Placenta. II ed. Chance D, Geisinger A, Green Terry A, Conno S, Cannon T, Cronin J, editors. Philadelphia, PA: Elsevier; 2015.
6. Khong TY, Mooney EE, Ariel I, Balmus NC, Boyd TK, Brundler MA, et al. Sampling and Definitions of Placental Lesions: Amsterdam Placental Workshop Group Consensus Statement. *Arch Pathol Lab Med*. 2016; **140**:698-713.
7. Fujiwara H, Sato Y, Nishioka Y, Yoshioka S, Kosaka K, Fujii H, et al. New regulatory mechanisms for human extravillous trophoblast invasion. *Reprod Med Biol*. 2005; **4**:189-95.
